# Supplementary material
Source: PubMed Central journal article supplement (PMC7981784)
Supplement: NIHMS1676254-supplement-Supplemental_file_1.pdf [file NIHMS1676254-supplement-Supplemental_file_1.pdf]

# Supporting Information

## Discovery of M-808 as a Highly Potent, Covalent, Small-Molecule Inhibitor of the Menin-MLL Interaction with Strong *in vivo* Antitumor Activity

Shilin Xu<sup>†±±◇</sup>, Angelo Aguilar<sup>†±±</sup>, Liyue Huang<sup>†±±</sup>, Tianfeng Xu<sup>†+◇</sup>, Ke Zheng<sup>†+</sup>, Donna McEachern<sup>†+</sup>, Sally Przybranowski<sup>†+</sup>, Caroline Foster<sup>†+</sup>, Kaitlin Zawacki<sup>†+</sup>, Zhaomin Liu<sup>†+</sup>, Krishnapriya Chinnaswamy<sup>#</sup>, Jeanne Stuckey<sup>#</sup>, and Shaomeng Wang<sup>†+¶§\*</sup>

<sup>†</sup>Rogel Cancer Center, Departments of <sup>+</sup>Internal Medicine, <sup>¶</sup>Pharmacology, and <sup>§</sup>Medicinal Chemistry, Medical School, <sup>#</sup>Life Sciences Institute, University of Michigan, Ann Arbor, Michigan 48109, United States

**Table S1.** Crystallography Data Collection and Refinement Statistics for Co-Crystal Structure of M-808 in complex with Menin

| <b>Data Collection</b>                    | <b>Menin:M-808</b>                                                    |
|-------------------------------------------|-----------------------------------------------------------------------|
| PDB ID                                    | 6MN9                                                                  |
| Space Group                               | I4 <sub>1</sub>                                                       |
| Unit Cell (Å)                             | a = b = 153.549<br>c = 81.283<br>$\alpha = \beta = \gamma = 90^\circ$ |
| Wavelength (Å)                            | 0.9787                                                                |
| Resolution (Å) <sup>1</sup>               | 2.10 (2.10-2.14)                                                      |
| Rmerge <sup>2</sup>                       | 0.102 (2.55)                                                          |
| $\langle I/\sigma I \rangle$ <sup>3</sup> | 3 (1)                                                                 |
| Completeness (%) <sup>4</sup>             | 99.9 (99.0)                                                           |
| Redundancy                                | 6.9 (4.9)                                                             |
| <b>Refinement</b>                         |                                                                       |
| Resolution (Å)                            | 2.10                                                                  |
| R-Factor <sup>5</sup>                     | 0.191                                                                 |
| Rfree <sup>6</sup>                        | 0.228                                                                 |
| Protein atoms                             | 3701                                                                  |
| Ligands                                   | 1                                                                     |
| Water Molecules                           | 252                                                                   |
| Unique Reflections                        | 36178                                                                 |
| R.m.s.d. <sup>7</sup>                     |                                                                       |
| Bonds                                     | 0.009                                                                 |
| Angles                                    | 1.00                                                                  |
| MolProbability Score <sup>8</sup>         | 1.24                                                                  |
| Clash Score <sup>8</sup>                  | 2.15                                                                  |
| RSCC <sup>9</sup>                         | 0.92                                                                  |
| RSR <sup>9</sup>                          | 0.19                                                                  |

<sup>1</sup>Statistics for highest resolution bin of reflections in parentheses.

<sup>2</sup> $R_{\text{merge}} = \sum_h \sum_j |I_{hj} - \langle I_h \rangle| / \sum_h \sum_j I_{hj}$ , where  $I_{hj}$  is the intensity of observation j of reflection h and  $\langle I_h \rangle$  is the mean intensity for multiply recorded reflections.

<sup>3</sup>Intensity signal-to-noise ratio.

<sup>4</sup>Completeness of the unique diffraction data.

<sup>5</sup>R-factor =  $\sum_h | |F_o| - |F_c| | / \sum_h |F_o|$ , where  $F_o$  and  $F_c$  are the observed and calculated structure factor amplitudes for reflection h.

<sup>6</sup> $R_{\text{free}}$  is calculated against a 5% random sampling of the reflections that were removed before structure refinement.

<sup>7</sup>Root mean square deviation of bond lengths and bond angles.

<sup>8</sup>Chen et al. (2010) MolProbability: all-atom structure validation for macromolecular crystallography. Acta Crystallographica D66:12-21.

<sup>9</sup>wwPDB Validation Server.

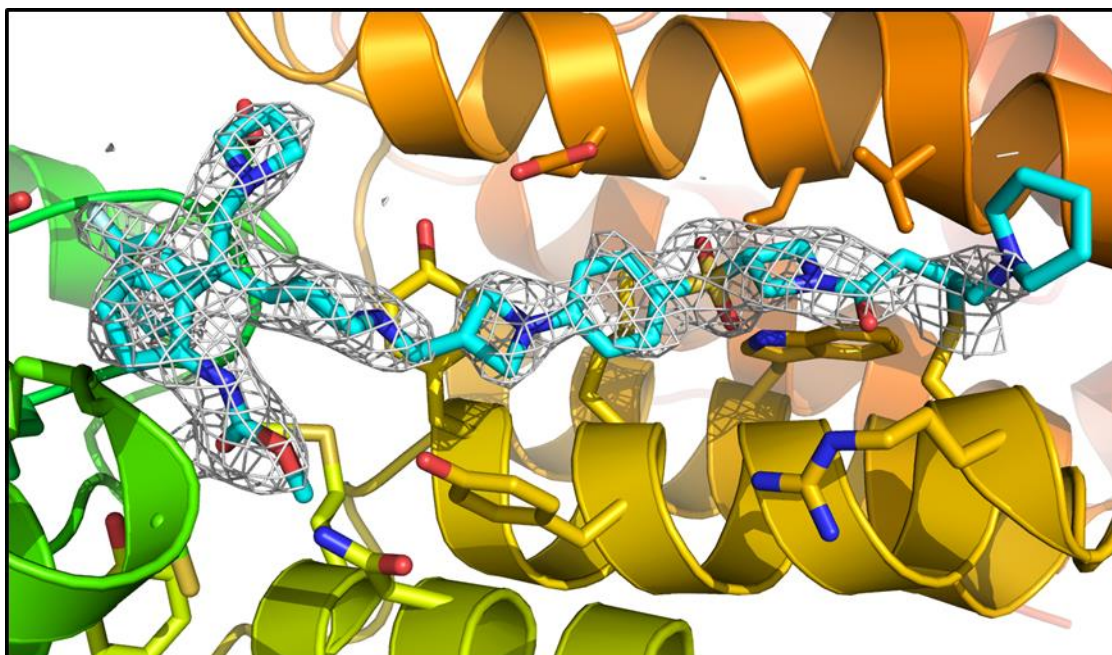

**Figure S1.** Omit map shows that M-808 covalently binds to S $\gamma$  atom of C329 of menin protein. M-808 is shown with cyan carbons. Fo-Fc electron density maps are shown as grey grids contoured at  $3\sigma$ .

## Purity of the Final Compounds Determined by UPLC

**Table S2.** Purity and retention time of compounds **7-20** determined by UPLC

| <b>Compd.</b>     | <b>Retention time (min)</b> | <b>Purity (%)</b> |
|-------------------|-----------------------------|-------------------|
| <b>7</b>          | 3.24                        | 97.8              |
| <b>8</b>          | 3.62                        | 99.2              |
| <b>9</b>          | 2.82                        | 98.1              |
| <b>10</b>         | 2.79                        | 96.4              |
| <b>11</b>         | 2.93                        | 97.5              |
| <b>12</b>         | 3.15                        | 97.8              |
| <b>13</b>         | 3.20                        | 99.2              |
| <b>14</b>         | 2.87                        | 97.6              |
| <b>15</b>         | 2.95                        | 99.8              |
| <b>16 (M-808)</b> | 3.09                        | 98.5              |
| <b>17</b>         | 2.89                        | 98.8              |
| <b>18</b>         | 3.01                        | 99.1              |
| <b>19</b>         | 3.07                        | 98.2              |
| <b>20</b>         | 3.20                        | 97.1              |
